# Supplementary material for: A Phase I Study of the Pan-Notch Inhibitor CB-103 for Patients with Advanced Adenoid Cystic Carcinoma and Other Tumors
Source: PubMed Central journal article supplement (PMC10501326; doi:10.1158/2767-9764.crc-23-0333), 2023-09-14
Supplement: crc-23-0333-s02.pdf [file crc-23-0333-s02.pdf]

## Supplemental Figure 2. Pharmacokinetic parameters

**A**

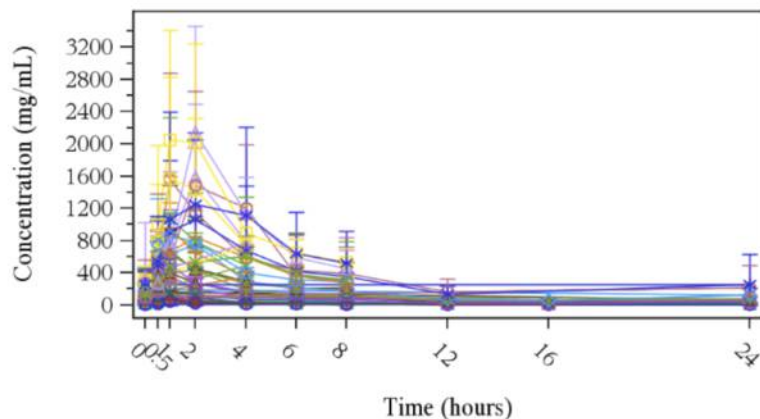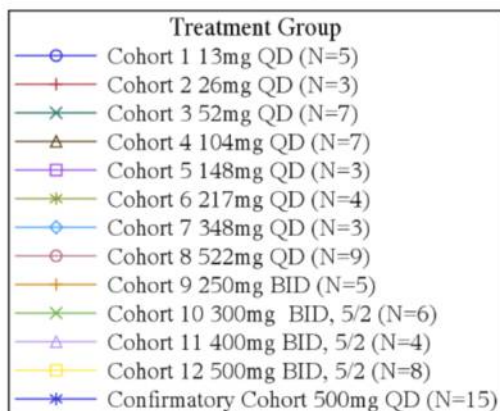

**B**

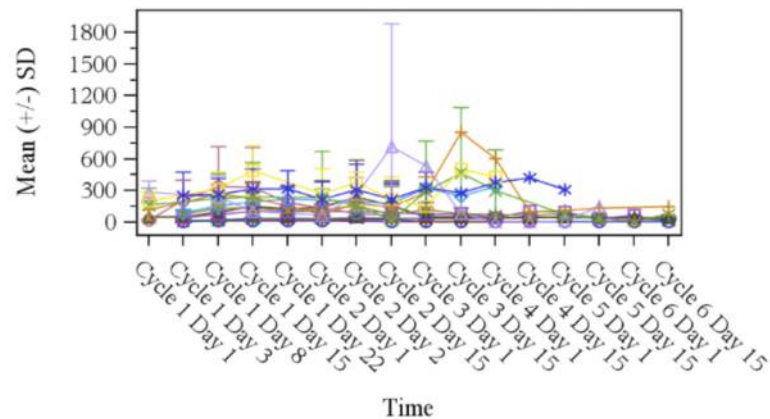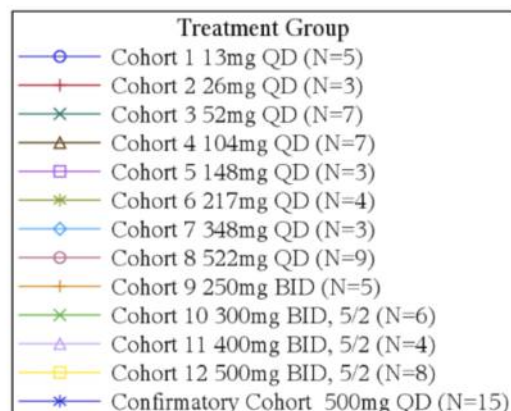

**(A)** Plasma drug concentrations (ng/mL) of CB-103 measured at pre-specified timepoints over 24 hours on cycle 1 day 1 of dosing. **(B)** Pre-dose mean plasma drug concentration (ng/mL) of CB-103 measured through cycle 6 of treatment. Mean Standard deviation denoted by error bars; color coding by dose escalation and confirmatory dose cohort subgroups.
