# Supplementary material for: A Phase I Study of the Pan-Notch Inhibitor CB-103 for Patients with Advanced Adenoid Cystic Carcinoma and Other Tumors
Source: PubMed Central journal article supplement (PMC10501326; doi:10.1158/2767-9764.crc-23-0333), 2023-09-14
Supplement: crc-23-0333-s03.pdf [file crc-23-0333-s03.pdf]

### Supplemental Figure 3. Biomarkers of Clinical Benefit for ACC patients

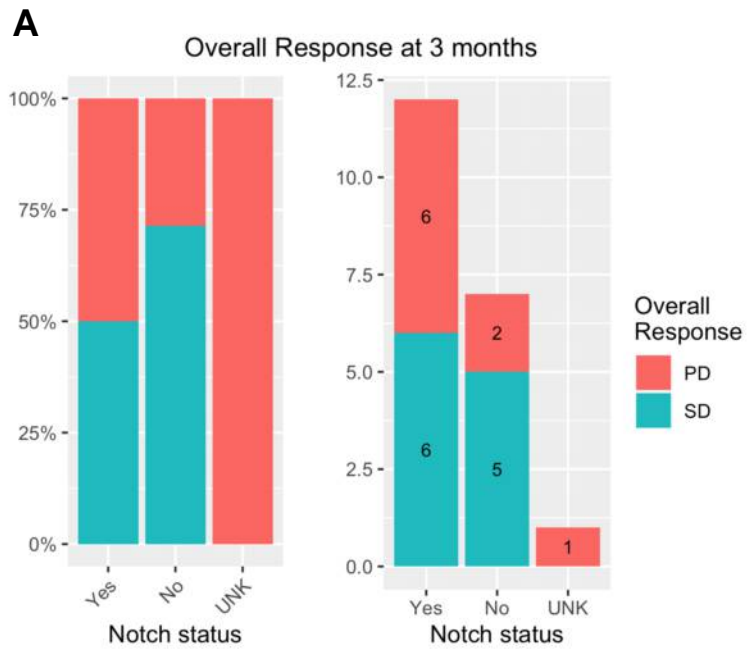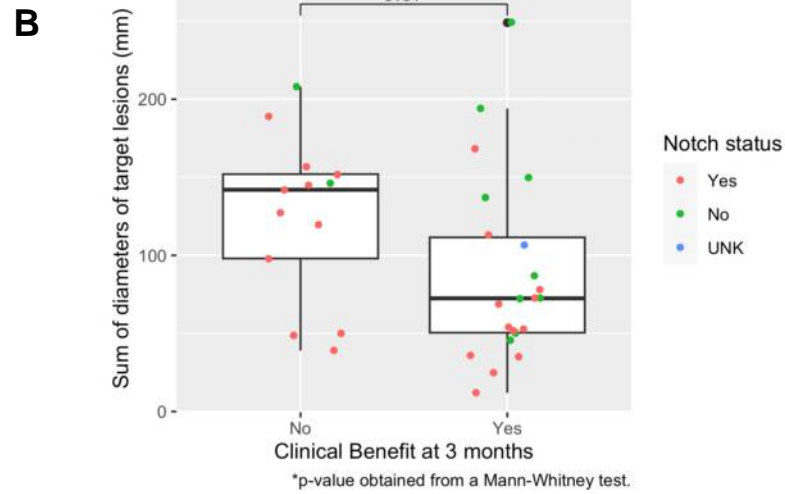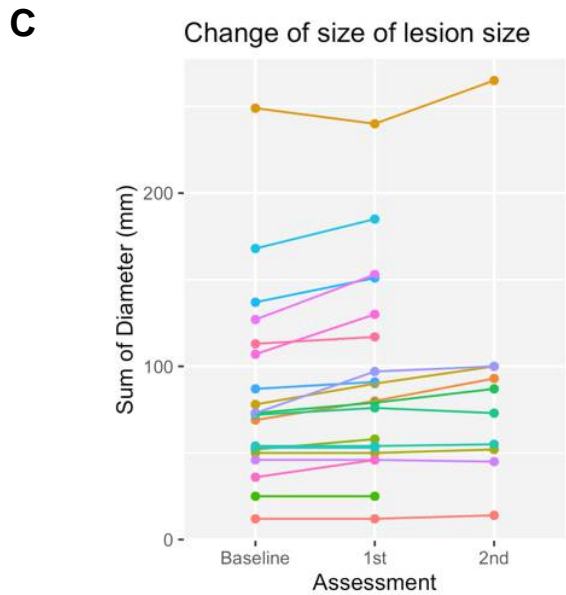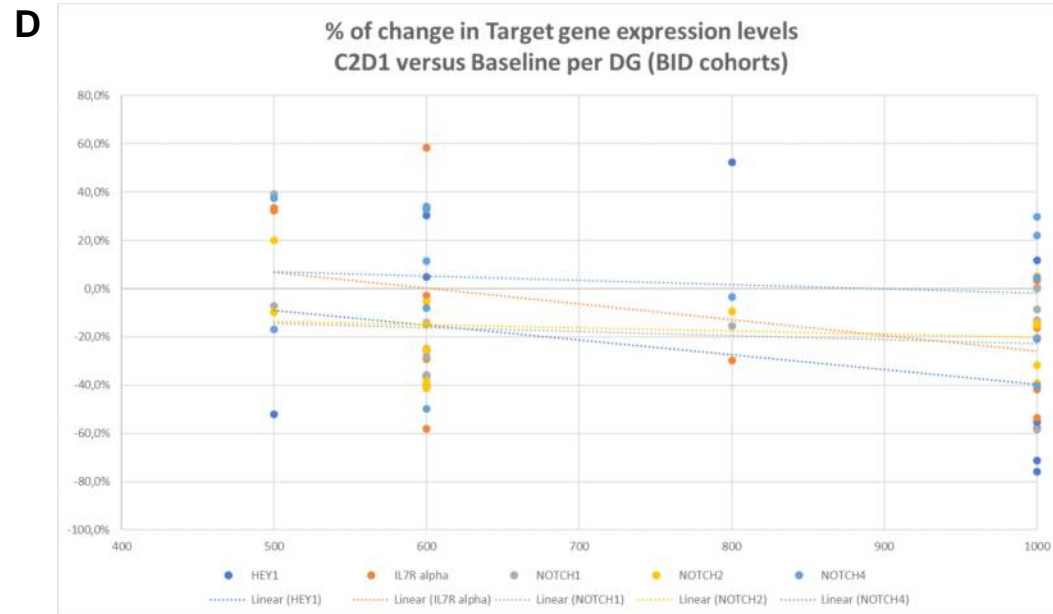

**(A)** Histograms showing overall response at 3 months color-coded by stable disease (SD) or progressive disease (PD) and plotted as a function of Notch mutational status (yes=positive, no=negative, unk=unknown). **(B)** Box and whisker plot showing clinical benefit or SD rate at 3-month benchmark (Y=yes or N=no) plotted against total tumor burden (sum of diameters of all target lesions in millimeters [mm]) and color-coded by Notch mutational status. **(C)** Dot plot showing individual baseline or pre-treatment patient tumor burden (sum of diameter of target lesions in millimeters) over time to 1<sup>st</sup> assessment at 6-weeks and 2<sup>nd</sup> assessment at 12-weeks (according to RECIST v1.1); each patient represents a colored dot-line. **(D)** Dot plot showing percent change (%) in target Notch gene expression levels at cycle 2, day 1 compared with baseline among a range of twice daily (BID cohorts) dose groups (DGs) from left to right.
